# Supplementary material
Source: Elsevier journal article supplement (https://www.sciencedirect.com/science/article/pii/S0300893224005232)
Supplement: mmc1 [file mmc1.pdf]

## **SUPPLEMENTARY DATA**

### **PRINCIPAL INVESTIGATORS AND PARTICIPATING CENTERS**

The authors guarantee that the following researchers are responsible for the data published in this study:

- Pediatric Cardiology Department, Hospital Marie-Lannelongue, M3C National reference center, Faculté de Médecine Paris-Saclay, University Paris-Saclay, France. Co-investigators.: Hugues LUCRON, Sebastien HASCÖET
- Pediatric Cardiology Department, M3C National reference center, Hospital Necker-Enfants Malades, Assistance Publique-Hôpitaux de Paris, University Paris Cité, Paris, France. Co-investigators: Sophie-Guiti Malekzadeh-Milani, Damien Bonnet
- Pediatric Cardiology Department, University Hospital of Lyon, Lyon, France. Principal investigator: Thomas Perouse de Montclos
- Department of Pediatric Cardiology and Pediatric Cardiac Surgery, University Hospital of Nantes, Nantes Université, CRNS, INSERM, Nantes, France. Principal investigator: Alban-Elouen Baruteau
- Departamento de Cardiología Pediátrica, Hospital Universitario 12 de Octubre, Madrid, Spain. Principal investigator: Alberto Mendoza Soto
- Pediatric Cardiology Department, IRCCS Ospedale Pediatrico Bambino Gesù, Roma, Italia. Principal investigator: Gianfranco Butera
- Pediatric Cardiology Department, University Clinic for Pediatric and Adolescent medicine, Medical University Vienna, Vienna, Austria. Principal investigator: Ina Michel-Behnke
- Pediatric Cardiology Department, University Hospital of Marseille, Marseille, France. Principal investigator: Caroline Ovaert

- Pediatric Cardiology Department, Royal Brompton Hospital, London, United Kingdom.  
Principal investigator: Carles Bautista-Rodriguez
- Congenital Heart Unit, Leeds Teaching Hospital, Leeds, United Kingdom. Principal investigator: James Bentham
- Pediatric Cardiology Department, Bordeaux University Hospital, Bordeaux, France.  
Principal investigator: Zakaria Jalal
- Unidad de Cirugía Cardíaca Pediátrica, Hospital Vall d'Hebron, Barcelona, Spain.  
Principal investigator: Pedro Betrian Blasco
- Pediatric Cardiology Department, University Hospital of Grenoble, Grenoble, France.  
Principal investigator: Hélène Bouvaist
- Pediatric Cardiology Department, University Hospital of Montpellier, Montpellier, France. Principal investigator: Marie Vincenti
- Pediatric Cardiology Department, Santa Marta Hospital, Unidade Local de Saúde São José, Lisboa, Portugal. Principal investigator: José Diego Ferreira Matins
- Neonatal Intensive Care Department, Regional Maternity, University Hospital of Nancy, Nancy, France. Principal investigators: Jean-Marc Jellimann
- Pediatric Cardiology Department, University Hospital of Strasbourg, Strasbourg, France.  
Principal investigator: Laurent Bonnemains
- Pediatric Cardiology Department, University Hospital Robert Debré, Paris, France.  
Principal investigators: Ronan Bonnefoy
- Pediatric Cardiology, Azienda Ospedale Università, Padova, Italia. Principal investigator: Biagio Castaldi
- Pediatric Cardiology Department, University Hospital of Reims, Reims, France. Principal investigator: Anne Charbonneau
- Pediatric Cardiology Department, University hospital of Clermont-Ferrand, Clermont-Ferrand, France. Principal investigator: Claire Dauphin

- Pediatric Cardiology Department, University Hospital of Tours, Tours, France. Principal investigator: Bruno Lefort
- Center for Congenital Heart Disease, Heart and Diabetes Center NRW, University Hospital of the Ruhr University Bochum, Medical Faculty OWL (University of Bielefeld), Bad Oeynhausen, Germany. Principal investigator: Stephan Schubert
- Pediatric Cardiology Center, University Hospital of Martinique, Martinique, France. Principal investigator: Mélanie Brard
- Pediatric Cardiology Department, University Hospital of Lille, Lille, France. Principal investigator: Olivia Domanski
- Pediatric Cardiology Department, University Hospital of Dijon, Dijon, France. Principal investigator: Charlotte Denis
- Pediatric Cardiology, Children's University Hospital, Geneva, Switzerland. Principal investigator: Julie Wacker
- Pediatric Cardiology Department, University Hospital of Caen, Caen, France. Principal investigator: Pascale Maragnes
- Pediatric Cardiology Department, University Hospital of Toulouse, Toulouse, France. Principal investigator: Clément Karsenty
- Kinderkardiologie und Pädiatrische Intensivmedizin, Klinikum der Universität München, München, Germany. Principal investigator: André Jakob
